# Supplementary material for: Prognostic Role of Androgen Receptor in Triple Negative Breast Cancer: A Multi-Institutional Study
Source: MDPI journal article supplement (doi:10.3390/cancers11070995), 2019-07-17

# Supplementary Materials: Prognostic Role of Androgen Receptor in Triple Negative Breast Cancer: A Multi-Institutional Study

Shristi Bhattarai, Sergey Klimov, Karuna Mittal, Uma Krishnamurti, Xiaoxian (Bill) Li, Gabriela Oprea-Ilies, Ceyda Sonmez Wetherilt, Ansa Riaz, Mohammed A. Aleskandarany, Andrew R. Green, Ian O. Ellis, Guilherme Cantuaria, Meenakshi Gupta, Upender Manne, Johnson Agboola, Brett Baskovich, Emiel A. M. Janssen, Grace Callagy, Elaine M. Walsh, Anurag Mehta, Atika Dogra, Tanuja Shet, Pooja Gajaria, Tiffany Traina, Haruna A. Nggada, Abidemi Omonisi, Saad A. Ahmed, Emad A. Rakha, Padmashree Rida and Ritu Aneja

**Table S1.** Table showing overall survival of AR positive TNBC at different thresholds of AR.

| Different Threshold Analysis for AR-Positive TNBCs |           |          |         |            |          |         |                |          |         |            |
|----------------------------------------------------|-----------|----------|---------|------------|----------|---------|----------------|----------|---------|------------|
| Study                                              | 5% Cutoff |          |         | 10% Cutoff |          |         | Optimal Cutoff |          |         | Optimal    |
|                                                    | AR+ TNBC  | AR- TNBC | p-value | AR+ TNBC   | AR- TNBC | p-value | AR+ TNBC       | AR- TNBC | p-value |            |
| Cohorts                                            | Survival  | Survival |         | Survival   | Survival |         | Survival       | Survival |         | Cutoff (%) |
| US                                                 | 82.42     | 70.21    | 0.0402  | 82.5       | 70.59    | 0.0471  | 82.98          | 69.94    | 0.0248  | 2          |
| UK                                                 | 70.27     | 67.19    | 0.3711  | 70.53      | 67.36    | 0.3677  | 73.33          | 66.46    | 0.1613  | 30         |
| Nigeria                                            | 85.71     | 22.54    | 0.0846  | 80         | 23.43    | 0.2682  | 68.75          | 20.73    | 0.0117  | 2          |
| Ireland                                            | 60.34     | 75.43    | 0.0738  | 60.78      | 74.9     | 0.1127  | 58.93          | 75.64    | 0.0472  | 6          |
| Norway                                             | 63.33     | 77.03    | 0.0533  | 60.71      | 77.63    | 0.0211  | 57.69          | 78.21    | 0.0064  | 2          |
| India                                              | 75        | 91.55    | 0.0157  | 75         | 91.24    | 0.0304  | 80.77          | 92.06    | 0.0212  | 1          |

**Table S2.** Table representing number of cases and sample type evaluated for AR expression in global TNBC cohort and diverse institutions from US.

| Description of Study Cohorts and Samples                                 |              |             |                    |
|--------------------------------------------------------------------------|--------------|-------------|--------------------|
| Study Cohorts                                                            | No. of Cases | Sample Type | Years of Diagnosis |
| <b>UK</b><br>Nottingham Breast Cancer Research Center                    | 239          | TMA         | 1987–1998          |
| <b>Norway</b><br>Stavanger University Hospital                           | 104          | Full-Face   | 1978–2004          |
| <b>Ireland</b><br>NUI Galway, Lambe Institute for Translational Research | 222          | TMA         | 2000–2015          |
| <b>US</b><br>Emory University Hospital                                   | 420          |             | 2000–2014          |
| Grady Memorial Hospital                                                  | 142          | Full-Face   |                    |
| Northside Hospital Cancer Institute                                      | 114          | Full-Face   |                    |
| West Georgia Medical Center                                              | 95           | Full-Face   |                    |
| University of Alabama at Birmingham                                      | 32           | Full-Face   |                    |
| University of South Alabama College of Medicine                          | 23           | Full-Face   |                    |
| <b>Nigeria</b><br>Olabisi Onabanjo University                            | 14           | Full-Face   |                    |
| University of Maiduguri                                                  | 180          |             | 2000–2008          |
| Ekiti State University                                                   | 77           | Full-Face   |                    |
| Ahmadu Bello University                                                  | 16           | Full-Face   |                    |
| <b>India</b><br>Tata Memorial Hospital                                   | 45           | Full-Face   |                    |
| Rajiv Gandhi Cancer Institute and Research Center                        | 42           | Full-Face   |                    |
|                                                                          | 242          |             | 2005–2014          |
|                                                                          | 139          | TMA         |                    |
|                                                                          | 103          | Full-Face   |                    |

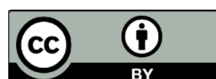

Supplement: s1 [file s1]
